# Supplementary material for: Targeting CD10 on B-Cell Leukemia Using the Universal CAR T-Cell Platform (UniCAR)
Source: MDPI journal article supplement (doi:10.3390/ijms23094920), 2022-04-28
Supplement: s1 [file s1]

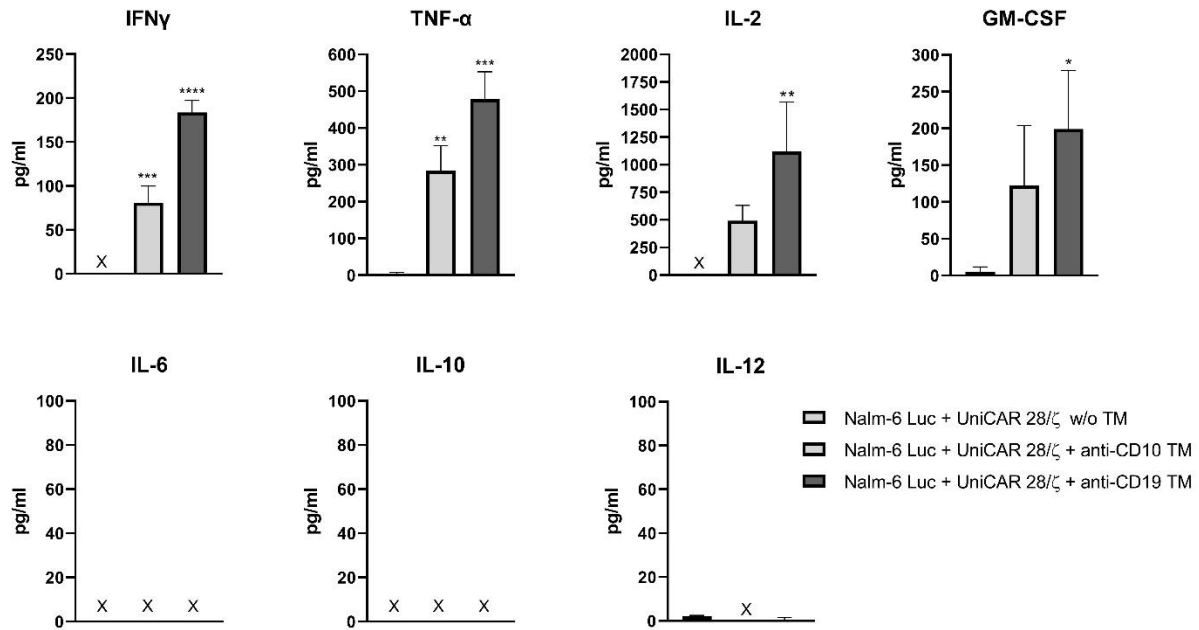

**Figure S1.** Cytokine release by UniCAR T-cells armed with anti-CD10 TM analyzed using MACSplex technology. UniCAR T-cells were co-cultured for 7 hrs with Nalm-6 Luc cells at 5:1 E:T ratio in the absence or presence of 50 nM of anti-CD10 TM or anti-CD19 TM. The cell-free supernatants were then collected and the cytokines were analyzed by MACSplex cytokine kit. Data is shown as mean  $\pm$  SD of three independent donors (\* $p$  < 0.0332, \*\* $p$  < 0.0021, \*\*\* $p$  < 0.0002, \*\*\*\* $p$  < 0.0001; comparison to sample w/o TM; One-way ANOVA with Dunnett's multiple comparison test).
